# Supplementary material for: HYL1 controls the miR156-mediated juvenile phase of vegetative growth
Source: PubMed Central journal article supplement — J Exp Bot. 2012 Jan 20;63(7):2787–98. doi: 10.1093/jxb/err465 (PMC3346236; doi:10.1093/jxb/err465), 2012-01-20
Supplement: supp_err465_00071936-file001.pdf [file supp_err465_00071936-file001.pdf]

## HYL1 Controls the miR156-mediated Juvenile Phase of Vegetative Growth

Shuxia Li, Xi Yang and Yuke He

### SUPPLEMENTARY DATA

Supplementary Table 1. 10 genes that are most deregulated (upregulated and downregulated) in *hyl1* seedlings relative to wild type and in *hyl1-2 p35S::miR156a* (*hyl1 156*) relative to *hyl1* seedlings.

| Transcripts | Genes     | <i>hyl1</i> /WT | <i>hyl1 156/hyl1</i> |
|-------------|-----------|-----------------|----------------------|
| ENH1        | At5g17170 | 0.35            | 1.52                 |
| Unknown     | At1g26920 | 0.61            | 1.51                 |
| MYB59       | At5g59780 | 0.36            | 1.08                 |
| PAP17       | At3g17790 | 2.23            | 1.08                 |
| Unknown     | At5g05250 | 5.51            | 0.32                 |
| ORG1        | At5g53450 | 1.52            | 0.64                 |
| SPL3        | At2g33810 | 1.83            | 0.28                 |
| FRO3        | At1g23020 | 1.95            | 0.43                 |
| Unknown     | At1g47400 | 2.21            | 0.58                 |
| SPL5        | At3g15270 | 3.25            | 0.32                 |

Supplementary Table 2. 10 genes that are most deregulated (upregulated and downregulated) in *se-1* seedlings relative to wild type and *se-1 p35S::miR156a* relative to *se-1* seedlings. The data are derived from GEO GSE16061.

| Genes            | Transcripts | <i>se-1</i> /WT | <i>se-1 156/se-1</i> |
|------------------|-------------|-----------------|----------------------|
| At2g25510        | At2g25510   | 0.23            | 3.32                 |
| PRP              | At5g43580   | 0.25            | 2.00                 |
| GDSL-like Lipase | At1g54010   | 0.32            | 2.96                 |
| ECS1             | At1g31580   | 0.33            | 3.12                 |
| SPL3             | At2g33810   | 2.39            | 0.21                 |
| Cystatin         | At1g20160   | 3.55            | 0.40                 |
| At5g52790        | At5g52790   | 3.84            | 0.67                 |
| Chitinase        | At2g43620   | 3.84            | 0.47                 |
| P450             | At3g26200   | 4.16            | 0.15                 |
| ATSBT5.2         | At1g20160   | 4.21            | 0.57                 |

Supplementary Table 3. Oligonucleotide primer sequences.

| Gene              | Sequence(5'-3')          | Purpose       |
|-------------------|--------------------------|---------------|
| <i>SPL2</i> -RT-S | AGATTTCGATACCGAGCACA     | Real-time PCR |
| <i>SPL2</i> -RT-A | TTGGAGGTTGCTTGAGGGATG    | Real-time PCR |
| <i>SPL3</i> -RT-S | ACCGCGGATATGAGCAAAGCCA   | Real-time PCR |
| <i>SPL3</i> -RT-A | GAGCGCGTGAAACCTGCTGC     | Real-time PCR |
| <i>SPL4</i> -RT-S | TGGAGAAGGATCAGGTCGGAGAGG | Real-time PCR |

---

|                    |                                 |                  |
|--------------------|---------------------------------|------------------|
| <i>SPL4</i> -RT-A  | CAGAGTGACCGTGGCTTTTGGT          | Real-time PCR    |
| <i>SPL5</i> -RT-S  | GGTCAGAGAACAACGCCGGG            | Real-time PCR    |
| <i>SPL5</i> -RT-A  | CCTGGCACAGTCGCGATGGA            | Real-time PCR    |
| <i>SPL6</i> -RT-S  | CCACGGAAGTATCCTCCATT            | Real-time PCR    |
| <i>SPL6</i> -RT-A  | TATCCTGCTTCACATCACCA            | Real-time PCR    |
| <i>SPL9</i> -RT-S  | CAAGGTTCAAGTTGGTGGAGGA          | Real-time PCR    |
| <i>SPL9</i> -RT-A  | TGAAGAAGCTCGCCATGTATTG          | Real-time PCR    |
| <i>SPL10</i> -RT-S | AGCACCTCTCTTTCTCTGCGT           | Real-time PCR    |
| <i>SPL10</i> -RT-A | CGGCCACGGGAGTGTGTTTGAT          | Real-time PCR    |
| <i>SPL11</i> -RT-S | CACTTATGATACAAAGCCTAGACAA       | Real-time PCR    |
| <i>SPL11</i> -RT-A | GGGGATCCGAAGAGGTTGACA           | Real-time PCR    |
| <i>SPL13</i> -RT-S | GGGAAATAGTCTTGTAAGCGTTGC        | Real-time PCR    |
| <i>SPL13</i> -RT-A | TGGGACAAAGAAAGTGGTGGT           | Real-time PCR    |
| <i>SPL15</i> -RT-S | GTGGTCAACCGCAAGATCAGT           | Real-time PCR    |
| <i>SPL15</i> -RT-A | TGAGCCATTGTAACCTTATCG           | Real-time PCR    |
| pri-miR156a-RT-S   | CTCAAGTTCATTGCCATTTTTAGG        | Real-time PCR    |
| pri-miR156a-RT-A   | GAGAGATTGAGACATAGAGAACGAAGA     | Real-time PCR    |
| <i>HYL1</i> -RT-S  | TCCAGTGAGCTAAGCCAATG            | Real-time PCR    |
| <i>HYL1</i> -RT-A  | ACTGAGCCTTCCTGGCTTTA            | Real-time PCR    |
| <i>REV</i> -RT-S   | AACTTCAAGGCTCCTACAGTCACG        | Real-time PCR    |
| <i>REV</i> -RT-A   | GAATAGTCCTGCTGGATTGCTCTCA       | Real-time PCR    |
| <i>CNA</i> -RT-S   | CAGCACCAATTGGCATCTCAA           | Real-time PCR    |
| <i>CNA</i> -RT-A   | CAGCCAGAAATCGCGTGGT             | Real-time PCR    |
| <i>PHV</i> -RT-S   | TCTTCTCTCGGGATTGCGGA            | Real-time PCR    |
| <i>PHV</i> -RT-A   | CTGAGTGTTGACAAGCTCGA            | Real-time PCR    |
| <i>PHB</i> -RT-S   | TTTCTATAGCAGAGGAGGCC            | Real-time PCR    |
| <i>PHB</i> -RT-A   | AGGAGCATACATCTGCGTGT            | Real-time PCR    |
| <i>HB8</i> -RT-S   | GAAAAACAGCGAAAAGAGG             | Real-time PCR    |
| <i>HB8</i> -RT-A   | GGACAATAATCCAGCAGGA             | Real-time PCR    |
| pri-miR156a-S      | CGGAATTCCTTAACCCAATTGGTTTACTTGA | Genomic fragment |
| pri-miR156a-A      | CGGGATCCATCAAATCTAGGGTTTTTGTC   | Genomic fragment |
| anti-miR156        | ATGCTCTCTATCTTCTGTCA            | probe            |
| anti-miR166        | GGGGAATGAAGCCTGGTCCGA           | probe            |
| anti-U6            | TCATCCTTGCGCAGGGGCCA            | probe            |

---

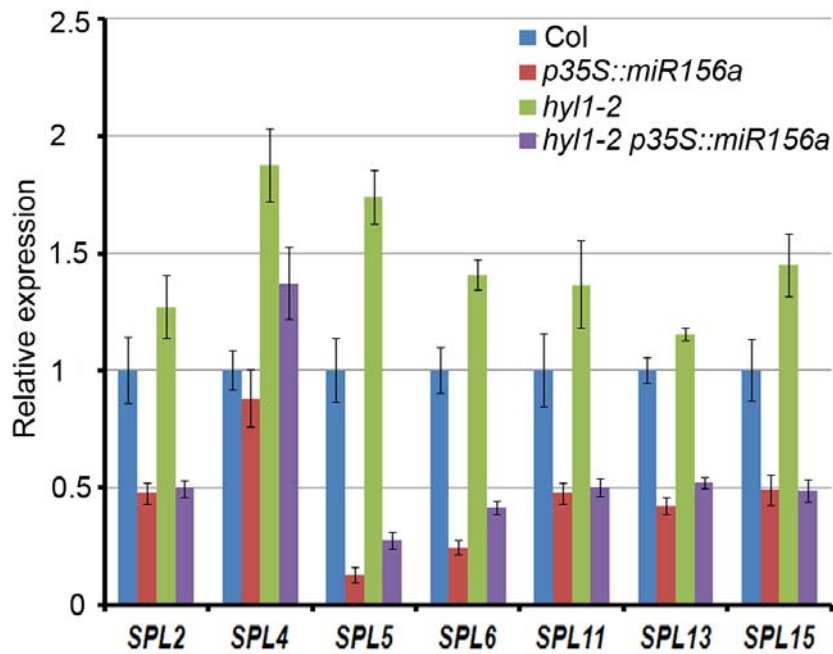

Supplementary Figure S1. Expression of *SPL2*, *4*, *5*, *6*, *11*, *13* and *15* genes in *hyl1-2* and transgenic plants. Expression was normalized relative to that of wild-type.  $\pm$  SD indicates standard deviation.
